# Supplementary material for: Splicing Modulation via Antisense Oligonucleotides in Recessive Dystrophic Epidermolysis Bullosa
Source: MDPI journal article supplement (doi:10.3390/ijms25020761), 2024-01-07
Supplement: s1 [file s1]

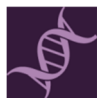

Supplementary Figures:

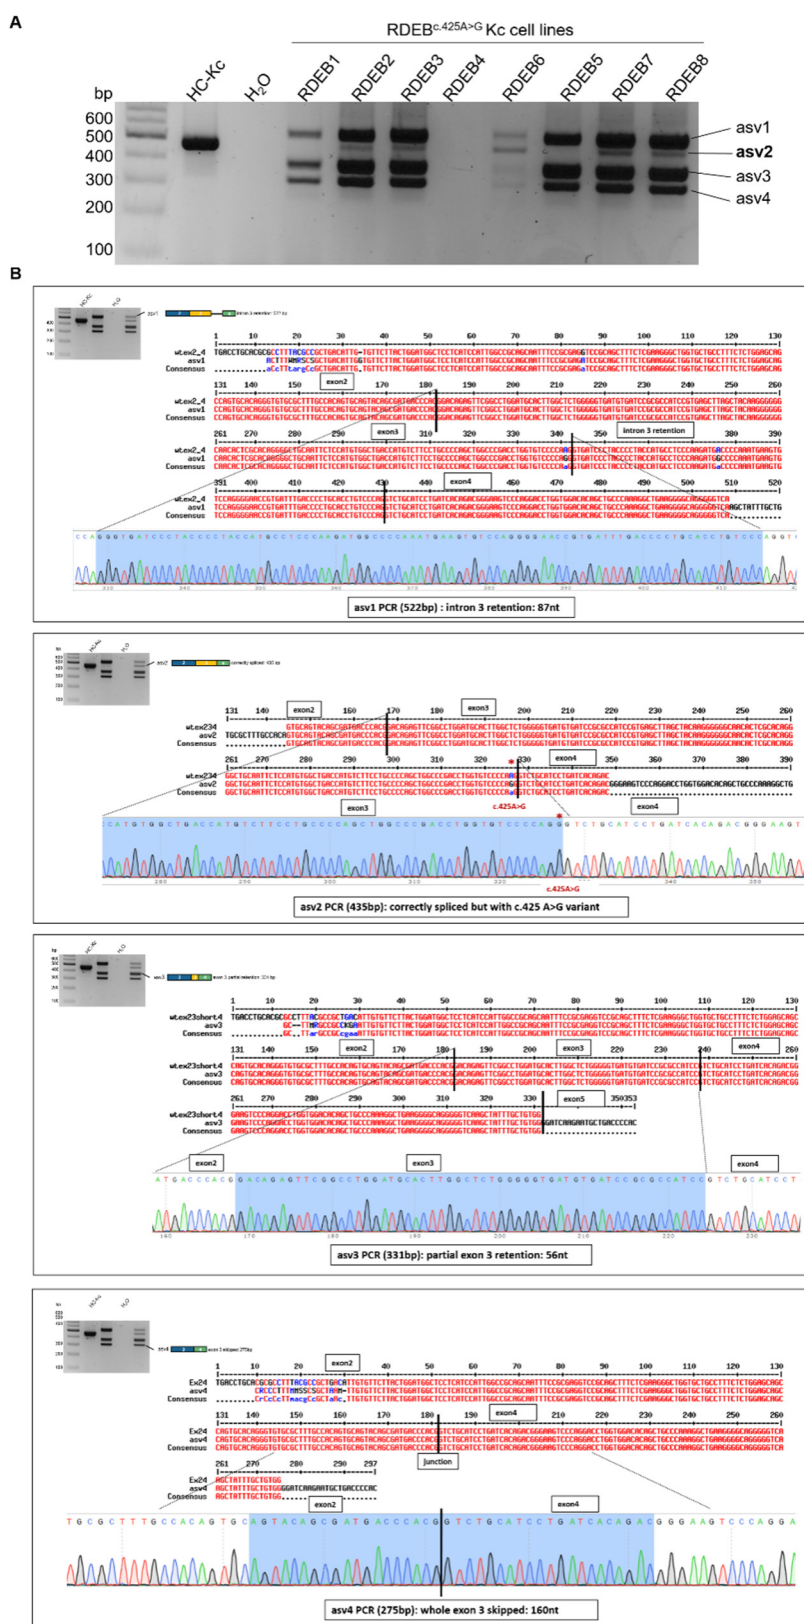

**Supplementary Figure 1:** (A) Residual levels of correctly-spliced *COL7A1* (asv2) were detected in 6 out of 8 primary keratinocytes from RDEB patients carrying the homozygous c.425A>G (p.K142R) variant on genomic level. (B) Sequence analysis of all detected splice variants.

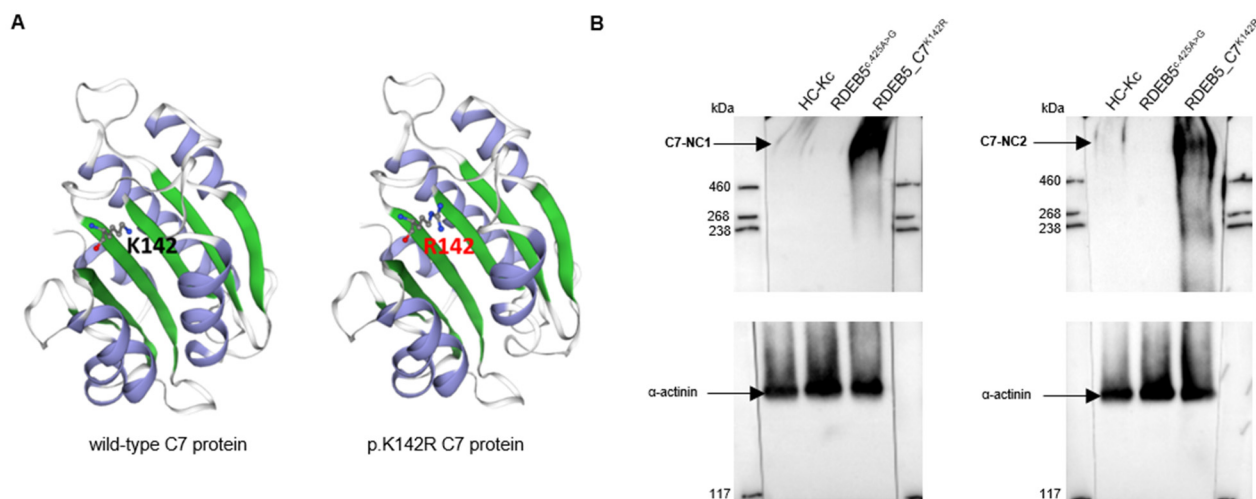

**Supplementary Figure 2:** (A) Prediction of protein folding of wildtype C7 protein (left) and C7 protein carrying a single conservative amino acid exchange (p.K142R). Modeling was done on SWISS-MODEL Interactive Workspace (expasy.org) using the von Willebrand Factor 1A domain (D38-V211) of C7. Ball-and-stick representation of lysine (K) and arginine (R) at position 142 is shown. (B) C7 trimer detection in RDEB5\_C7<sup>p.K142R</sup> Kc using native Western Blot conditions. Cell lysates were separated on 7 % Tris-Acetate gels.  $\alpha$ -Actinin was used as loading control.

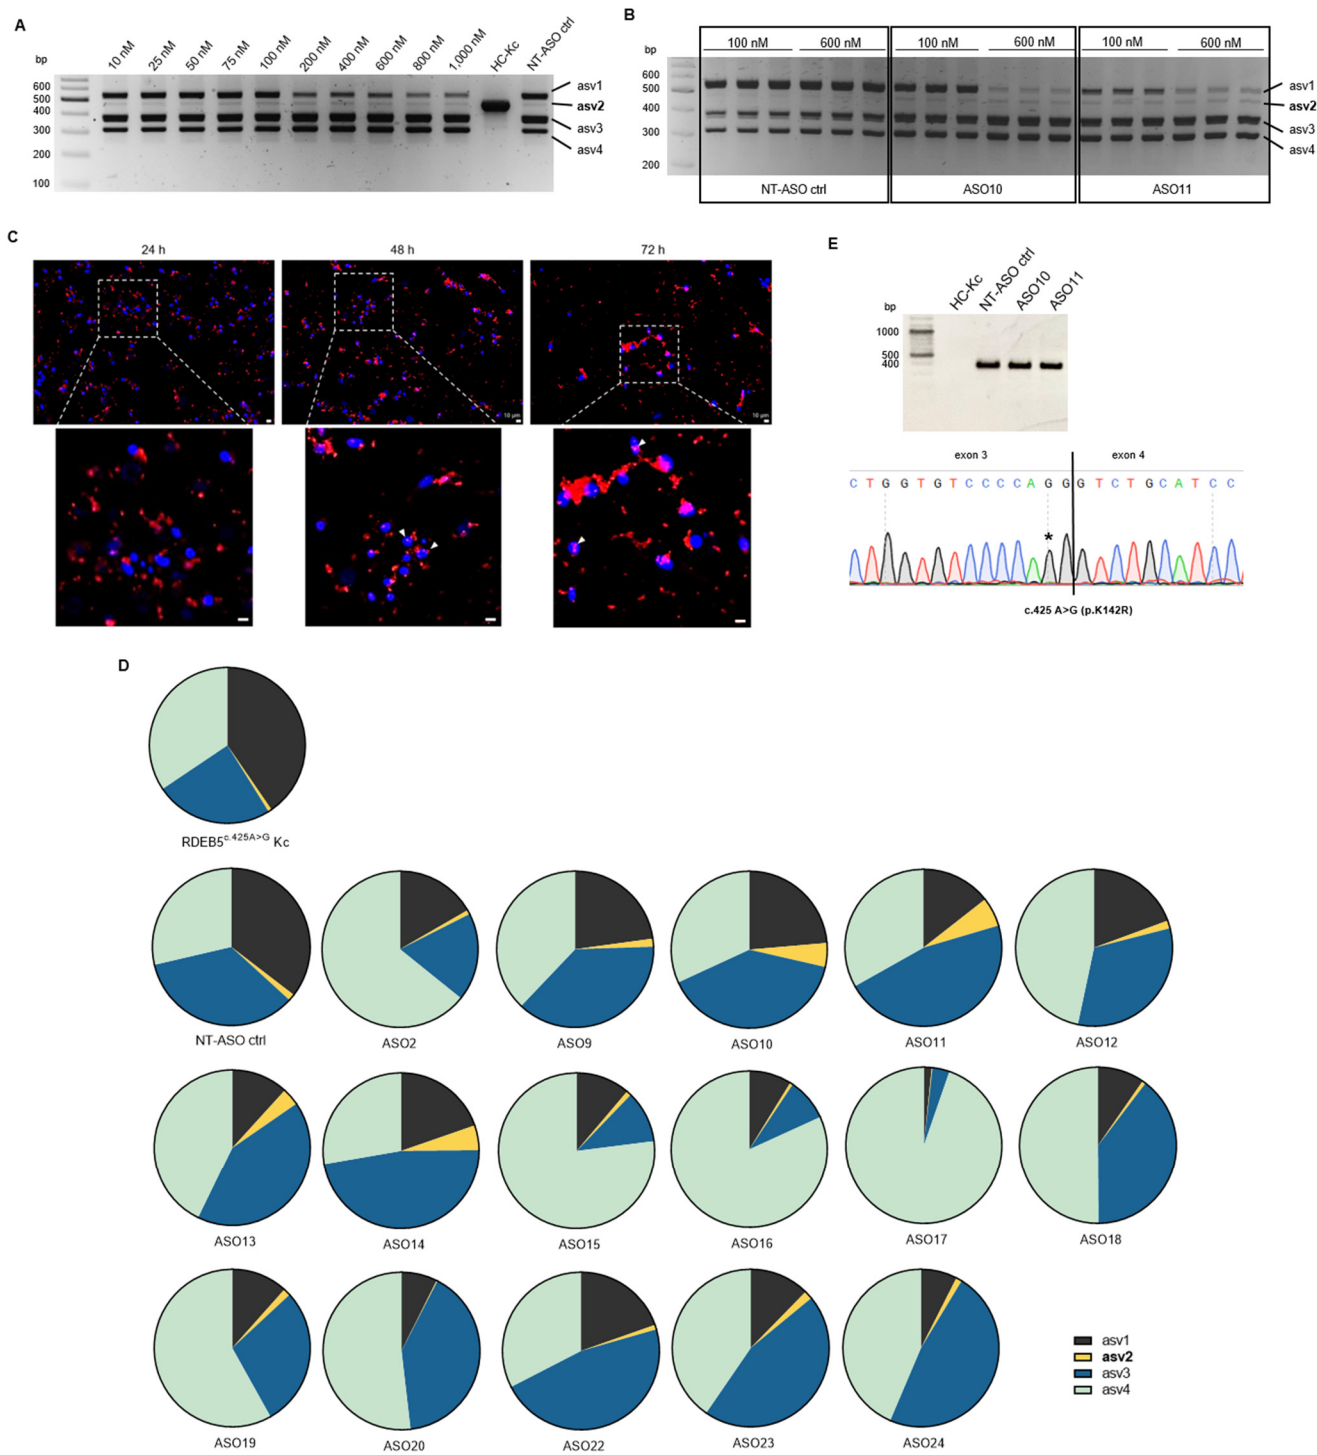

**Supplementary Figure 3:** (A) Initial concentration kinetics analysis to determine the concentration of ASO necessary to obtain the highest amount of asv2. (B) Second concentration kinetics analysis of the NT-ASO control, ASO10 and ASO11 to highlight the increased amount of asv2 when treated with 600 nM. (C) After transfection of RDEB5<sup>K142R</sup> cells with ASO11-Cy5, accumulation of ASOs was detectable in nuclei already 24 h post transfection, with a peak in signal intensity at 48 h. After 72h increased cell death was detectable. Cell nuclei were counterstained with Hoechst 33342 Solution, 20 mM (Thermo Fisher). Scale bar = 10 µm. (D) Depicturing of the amount of asv1, asv2, asv3 and asv4 in RDEB5<sup>K142R</sup> Kc after ASO transfection. (E) Representative analysis of the specificity of the sqPCR assay to specifically detect the asv2 transcript out of all COL7A1-transcripts present. Sanger sequencing confirmed the clean amplification of asv2. Densitometric analysis n = 3; sqPCR analysis n = 5.

## Supplementary Tables:

Supplementary Table 1: Sequences of all ASOs tested in the macro-walk.

| Macro-walk |                                         |               |
|------------|-----------------------------------------|---------------|
| ASO        | Sequence                                | % G~C content |
| neg ASO    | T*G*T*G*G*C*G*A*G*T*A*G*A*C*T*C*G*A*A*G | 55%           |
| ASO 2      | G*C*C*G*A*A*C*T*C*T*G*T*C*C*T*G*T*T*G*G | 60%           |
| ASO 9      | G*G*G*T*C*A*T*C*T*T*G*G*G*A*G*G*C*A*T*G | 60%           |
| ASO 10     | A*C*G*G*T*T*C*C*C*C*T*G*G*A*C*A*C*T*T*C | 60%           |
| ASO 11     | C*T*G*G*G*A*C*A*G*G*T*G*C*A*G*G*G*G*T*C | 70%           |
| ASO 12     | A*C*A*C*T*T*C*A*T*T*T*G*G*G*G*T*C*A*T*C | 45%           |
| ASO 13     | C*A*G*G*G*G*T*C*A*A*A*T*C*A*C*G*G*T*T*C | 55%           |
| ASO 14     | T*C*A*G*G*A*T*G*C*A*G*A*C*C*T*G*G*G*A*C | 60%           |
| ASO 15     | C*A*T*C*C*A*G*G*C*C*G*A*A*C*T*C*T*G*T*C | 60%           |
| ASO 16     | C*C*C*C*A*G*A*G*C*C*A*A*G*T*G*C*A*T*C*C | 65%           |
| ASO 17     | C*G*C*G*G*A*T*C*A*C*A*T*C*A*C*C*C*C*A   | 65%           |
| ASO 18     | T*A*A*G*C*T*C*A*C*G*G*A*T*G*G*C*G*C*G*G | 65%           |
| ASO 19     | T*G*C*C*C*C*C*T*T*G*T*A*G*C*T*A*A*G*C   | 60%           |
| ASO 20     | C*C*C*C*T*G*T*G*C*G*A*G*T*G*T*T*G*C*C*C | 70%           |
| ASO 21     | C*A*T*G*G*A*G*A*A*T*T*G*C*A*G*C*C*C*C*T | 55%           |
| ASO 22     | A*G*A*C*A*T*G*G*T*C*A*G*C*C*A*C*A*T*G*G | 55%           |
| ASO 23     | C*C*A*G*C*T*G*G*G*G*C*A*G*G*A*A*G*A*C*A | 65%           |
| ASO 24     | G*G*A*C*A*C*C*A*G*G*T*C*G*G*G*C*C*A*G*C | 75%           |

\* phosphorothioate bonds

Supplementary Table 2: Sequences of all ASOs tested in the micro-walk.

| Micro-walk |                                         |               |
|------------|-----------------------------------------|---------------|
| ASO        | Sequence                                | % G~C content |
| ASO 10.1   | G*G*T*T*C*C*C*C*T*G*G*A*C*A*C*T*T*C*A*T | 55%           |
| ASO 10.2   | C*G*G*T*T*C*C*C*C*T*G*G*A*C*A*C*T*T*C*A | 60%           |
| ASO 10.3   | A*C*G*G*T*T*C*C*C*C*T*G*G*A*C*A*C*T*T*C | 60%           |
| ASO 10.4   | C*A*C*G*G*T*T*C*C*C*C*T*G*G*A*C*A*C*T*T | 60%           |
| ASO 10.5   | T*C*A*C*G*G*T*T*C*C*C*C*T*G*G*A*C*A*C*T | 60%           |
| ASO 10.6   | A*T*C*A*C*G*G*T*T*C*C*C*C*T*G*G*A*C*A*C | 60%           |
| ASO 10.7   | A*A*T*C*A*C*G*G*T*T*C*C*C*C*T*G*G*A*C*A | 55%           |
| ASO 10.8   | A*A*A*T*C*A*C*G*G*T*T*C*C*C*C*T*G*G*A*C | 55%           |

|           |                                       |     |
|-----------|---------------------------------------|-----|
| ASO 11.1  | C*A*A*A*T*C*A*C*G*G*T*T*C*C*C*T*G*G*A | 55% |
| ASO 11.2  | T*C*A*A*A*T*C*A*C*G*G*T*T*C*C*C*T*G*G | 55% |
| ASO 11.3  | G*T*C*A*A*A*T*C*A*C*G*G*T*T*C*C*C*T*G | 55% |
| ASO 11.4  | G*G*T*C*A*A*A*T*C*A*C*G*G*T*T*C*C*C*T | 55% |
| ASO 11.5  | G*G*G*T*C*A*A*A*T*C*A*C*G*G*T*T*C*C*C | 60% |
| ASO 11.6  | G*G*G*G*T*C*A*A*A*T*C*A*C*G*G*T*T*C*C | 60% |
| ASO 11.7  | A*G*G*G*G*T*C*A*A*A*T*C*A*C*G*G*T*T*C | 55% |
| ASO 11.8  | C*A*G*G*G*G*T*C*A*A*A*T*C*A*C*G*G*T*T | 55% |
| ASO 11.9  | G*C*A*G*G*G*G*T*C*A*A*A*T*C*A*C*G*G*T | 55% |
| ASO 1.10  | T*G*C*A*G*G*G*G*T*C*A*A*A*T*C*A*C*G*G | 55% |
| ASO 1.11  | G*T*G*C*A*G*G*G*G*T*C*A*A*A*T*C*A*C*G | 60% |
| ASO 1.12  | G*G*T*G*C*A*G*G*G*G*T*C*A*A*A*T*C*A*C | 60% |
| ASO 11.13 | A*G*G*T*G*C*A*G*G*G*G*T*C*A*A*A*T*C*A | 55% |
| ASO 11.14 | C*A*G*G*T*G*C*A*G*G*G*G*T*C*A*A*A*T*C | 55% |
| ASO 11.15 | A*C*A*G*G*T*G*C*A*G*G*G*G*T*C*A*A*A   | 55% |
| ASO 11.16 | G*A*C*A*G*G*T*G*C*A*G*G*G*G*T*C*A*A   | 55% |
| ASO 11.17 | G*G*A*C*A*G*G*T*G*C*A*G*G*G*G*T*C*A   | 60% |
| ASO 11.18 | G*G*G*A*C*A*G*G*T*G*C*A*G*G*G*G*T*C   | 65% |
| ASO 11.19 | T*G*G*G*A*C*A*G*G*T*G*C*A*G*G*G*G     | 65% |
| ASO 11.20 | C*C*T*G*G*G*A*C*A*G*G*T*G*C*A*G*G*G   | 70% |
| ASO 11.21 | A*C*C*T*G*G*G*A*C*A*G*G*T*G*C*A*G*G   | 70% |
| ASO 11.22 | G*A*C*C*T*G*G*G*A*C*A*G*G*T*G*C*A*G   | 70% |
| ASO 11.23 | A*G*A*C*C*T*G*G*G*A*C*A*G*G*T*G*C*A   | 65% |

\* phosphorothioate bonds
